# Supplementary material for: Spiralosides A–C, Three New C27-Steroidal Glycoalkaloids from the Fruits of Solanum spirale
Source: PubMed Central journal article supplement (PMC4940254; doi:10.1007/s13659-016-0103-9), 2016-06-18

## Supplementary data

### Spiralosides A–C, Three New C<sub>27</sub>-Steroidal

#### Glycoalkaloids from the Fruits of *Solanum spirale*

Dan Li <sup>a,b</sup>, Yun-Li Zhao <sup>a</sup>, Xu-Jie Qin <sup>a</sup>, Lu Liu <sup>a,b</sup>, Xing-Wei Yang <sup>a</sup>, Ying-Ying Chen <sup>a,b</sup>, Bei Wang <sup>a,b</sup>, Xin Wei <sup>a,b</sup>, Ya-Ping Liu <sup>a,\*</sup>, Xiao-Dong Luo <sup>a,\*</sup>

a. State Key Laboratory of Phytochemistry and Plant Resources in West China, Kunming Institute of Botany Chinese Academy of Sciences, Kunming 650201, China.

b. University of Chinese Academy of Sciences, Beijing 100039, China.

#### Corresponding Authors

\*xiao-dong luo

E-mail: [xdluo@mail.kib.ac.cn](mailto:xdluo@mail.kib.ac.cn)

Tel: 86-871-65223177, Fax: 86-871-65220277

#### Contents

| Figures | Content                                                                                 |
|---------|-----------------------------------------------------------------------------------------|
| S1      | Bioassay and General experimental procedures                                            |
| S2      | <sup>1</sup> H NMR spectrum of compound <b>1</b> (CD <sub>3</sub> OD).                  |
| S3      | <sup>13</sup> C and DEPT spectrum of compound <b>1</b> (CD <sub>3</sub> OD).            |
| S4      | HMBC spectrum of compound <b>1</b> (CD <sub>3</sub> OD).                                |
| S5      | HSQC spectrum of compound <b>1</b> (CD <sub>3</sub> OD).                                |
| S6      | <sup>1</sup> H- <sup>1</sup> H COSY spectrum of compound <b>1</b> (CD <sub>3</sub> OD). |
| S7      | ROESY spectrum of compound <b>1</b> (CD <sub>3</sub> OD).                               |
| S8      | HREIMS spectrum of compound <b>1</b>                                                    |
| S9      | IR spectrum of compound <b>1</b>                                                        |
| S10     | <sup>1</sup> H NMR spectrum of compound <b>2</b> (CD <sub>3</sub> OD).                  |
| S11     | <sup>13</sup> C and DEPT spectra of compound <b>2</b> (CD <sub>3</sub> OD).             |
| S12     | HSQC spectrum of compound <b>2</b> (CD <sub>3</sub> OD).                                |
| S13     | HMBC spectrum of compound <b>2</b> (CD <sub>3</sub> OD).                                |
| S14     | <sup>1</sup> H- <sup>1</sup> H COSY spectrum of compound <b>2</b> (CD <sub>3</sub> OD). |
| S15     | ROESY spectrum of compound <b>2</b> (CD <sub>3</sub> OD).                               |

|       |                                                                                         |
|-------|-----------------------------------------------------------------------------------------|
| S16   | HREIMS spectrum of compound <b>2</b>                                                    |
| S17   | IR spectrum of compound <b>2</b>                                                        |
| <hr/> |                                                                                         |
| S18   | <sup>1</sup> H NMR spectrum of compound <b>3</b> (CD <sub>3</sub> OD).                  |
| S19   | <sup>13</sup> C and DEPT spectra of compound <b>3</b> (CD <sub>3</sub> OD).             |
| S20   | HMBC spectrum of compound <b>3</b> (CD <sub>3</sub> OD).                                |
| S21   | HSQC spectrum of compound <b>3</b> (CD <sub>3</sub> OD)                                 |
| S22   | <sup>1</sup> H- <sup>1</sup> H COSY spectrum of compound <b>3</b> (CD <sub>3</sub> OD). |
| S23   | ROESY spectrum of compound <b>3</b> (CD <sub>3</sub> OD).                               |
| S24   | HREIMS spectrum of compound <b>3</b>                                                    |
| S25   | IR spectrum of compound <b>3</b>                                                        |
| <hr/> |                                                                                         |

## S1 Bioassay and General experimental procedures

### S1.1 Cytotoxicity Assay

The cytotoxic assay was performed using the MTT method, as previous method with slight modification. Briefly, human tumor cells were seeded into 96-well plates and permitted to adhere for 12 h before drug addition. For suspended cells, they were seeded immediately before drug addition with an initial density of  $5 \times 10^4$  cells/ml. Each cell line was incubated with different concentrations of the compounds for 48 h. DDP and Taxol were used as positive controls. Cell viability was measured and IC 50 values were calculated.

**Table S1** Cytotoxicity of compounds **1-3** against HL-60, A-549, SMMC-7721, MCF-7 and SW480 cell lines (IC<sub>50</sub>  $\mu$ M).

| sample            | HL-60  | SMMC-7721 | A-549  | MCF-7  | SW480  |
|-------------------|--------|-----------|--------|--------|--------|
| <b>1</b>          | >40    | >40       | >40    | >40    | >40    |
| <b>2</b>          | >40    | >40       | >40    | >40    | >40    |
| <b>3</b>          | >40    | >40       | >40    | >40    | >40    |
| <b>DDP(MW300)</b> | 1.28   | 4.35      | 5.68   | 14.97  | 17.54  |
| <b>Taxol</b>      | <0.008 | <0.008    | <0.008 | <0.008 | <0.008 |

### S1.2 General experimental procedures

**General experimental procedures.** Optical rotations were measured on a JASCO P-1020 digital polarimeter. IR spectra were recorded on a Bruker Tensor-27 infrared spectrophotometer with KBr pellets. ESI-MS spectra were recorded on a Bruker HTC/Esquire spectrometer. HR-ESI-MS spectra were recorded on an API Qstar Pulsar instrument. 1D and 2D NMR spectra were performed on a Bruker AVANCE III-600 spectrometer with TMS as the internal standard. Chemical shifts ( $\delta$ ) were expressed in ppm with reference to the solvent signals. Semi-HPLC was performed on a Waters 2489 HPLC with an Agilent ZORBAX SB-C18 (9.4  $\times$  250 mm) column. Column chromatography (CC) was performed on silica gel (200–300 mesh, Qingdao Marine Chemical Ltd., Qingdao, China). RP-18 gel (20–45 mm, Fuji Silysia Chemical Ltd, Japan), SephadexLH-20 (Pharmacia Fine Chemical Co, Ltd, Sweden). Fractions were monitored by TLC (GF254, Qingdao Marine Chemical Ltd., Qingdao, China), and spots were visualized by Dragendorff's reagent and 10% H<sub>2</sub>SO<sub>4</sub> in ethanol. GC analysis was performed on a Shimadzu GC-2010 gas chromatograph equipped with an H<sub>2</sub> flame ionization detector. L-rhamnose and D-glucose were purchased from J K Scientific Ltd. (Guangzhou, China).

**Figure S2.**  $^1\text{H}$  NMR spectrum of compound **1** ( $\text{CD}_3\text{OD}$ ).

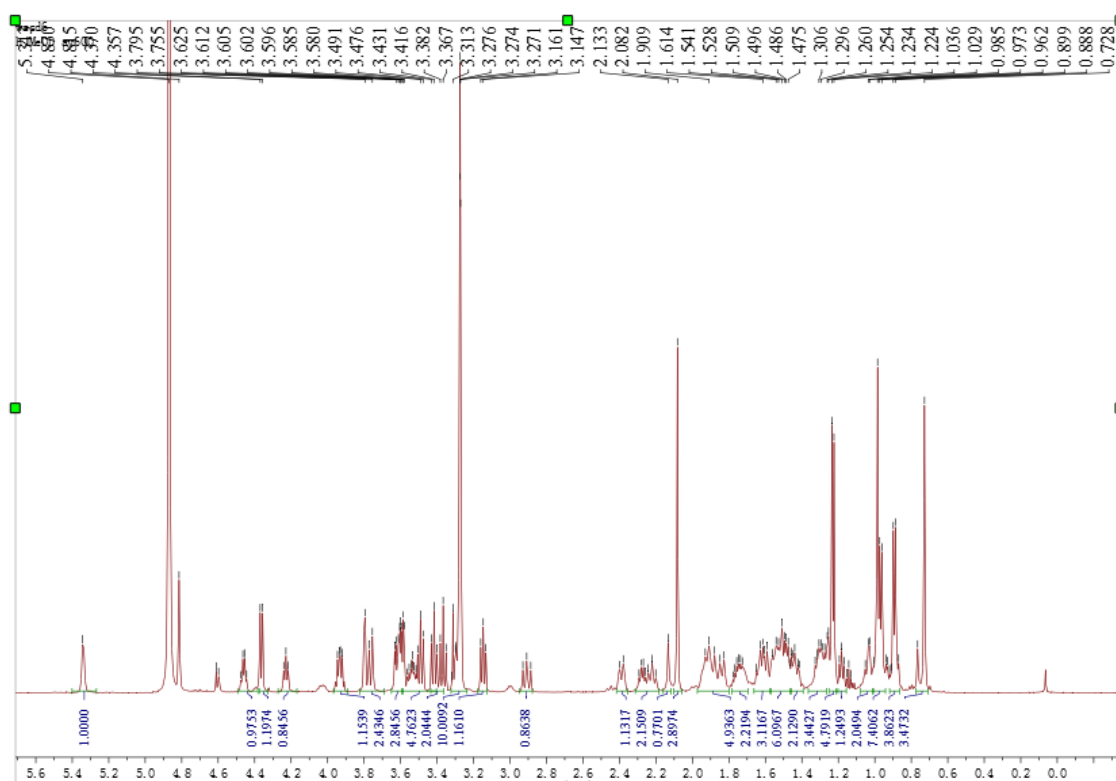

**Figure S3.**  $^{13}\text{C}$  and DEPT spectrum of compound **1** ( $\text{CD}_3\text{OD}$ )

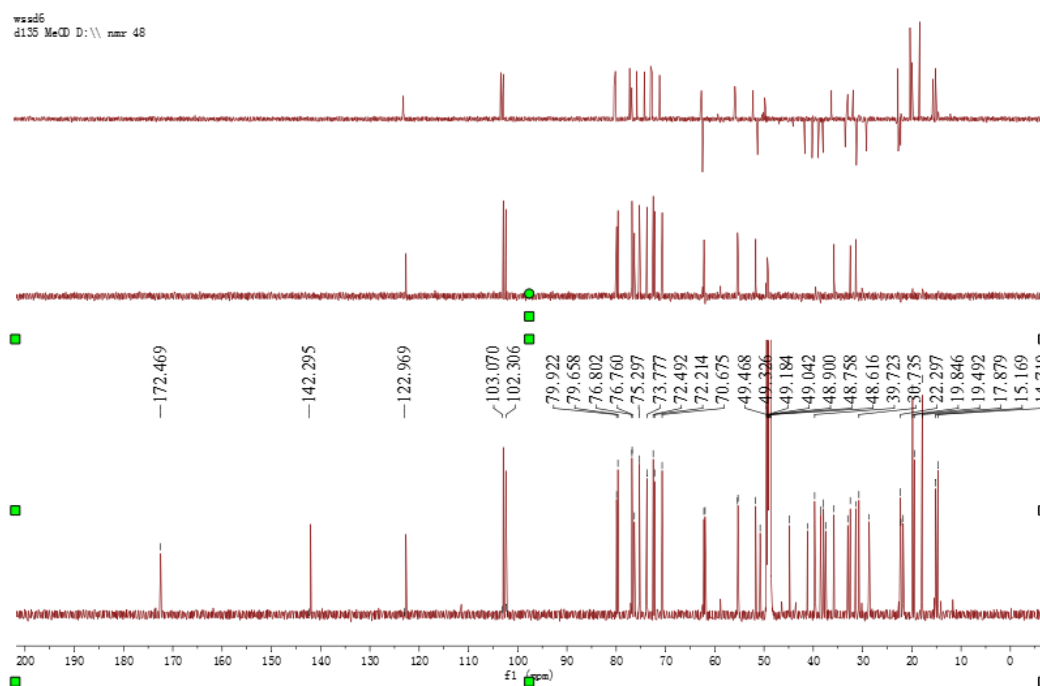

**Figure S4.** HMBC Spectrum of compound **1** (CD<sub>3</sub>OD)

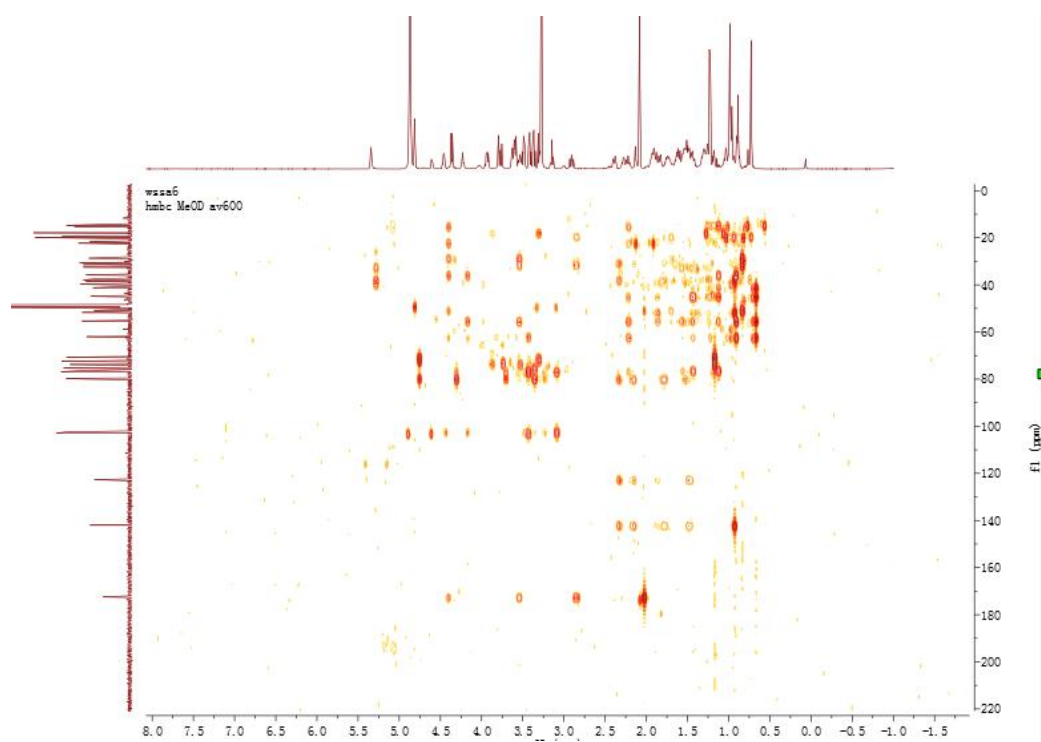

**Figure S5.** HSQC Spectrum of compound **1** (CD<sub>3</sub>OD)

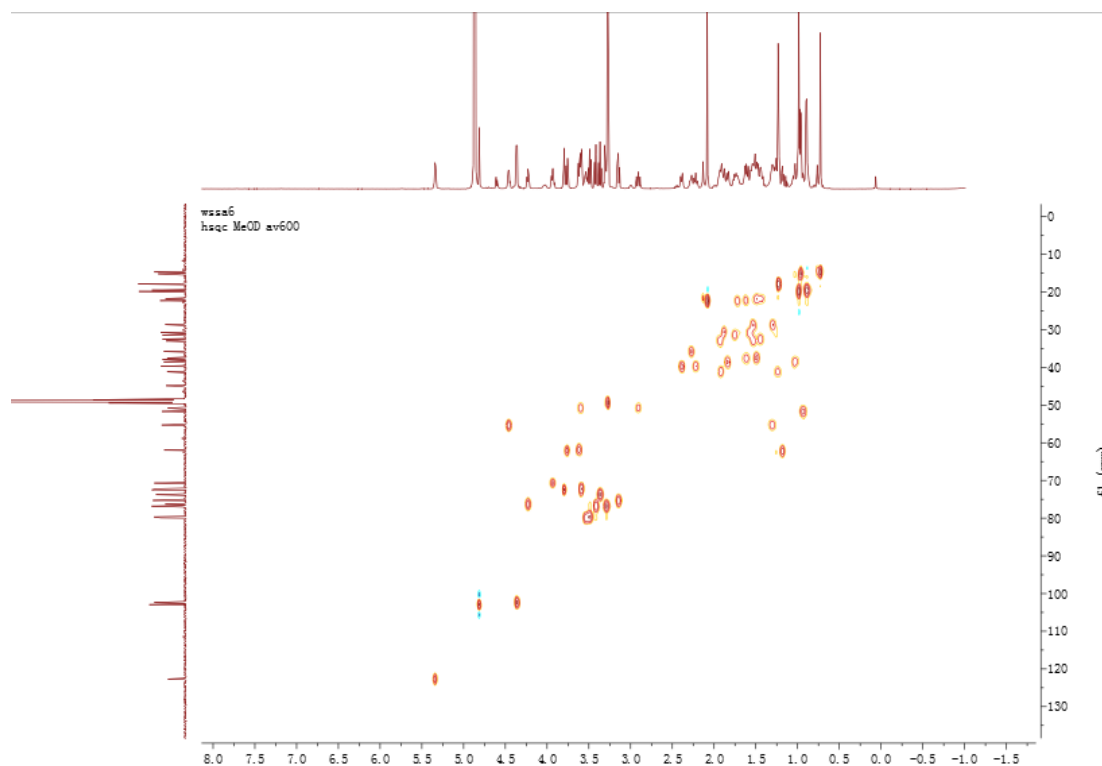

**Figure S6.**  $^1\text{H}$ - $^1\text{H}$  COSY Spectrum of compound **1** ( $\text{CD}_3\text{OD}$ )

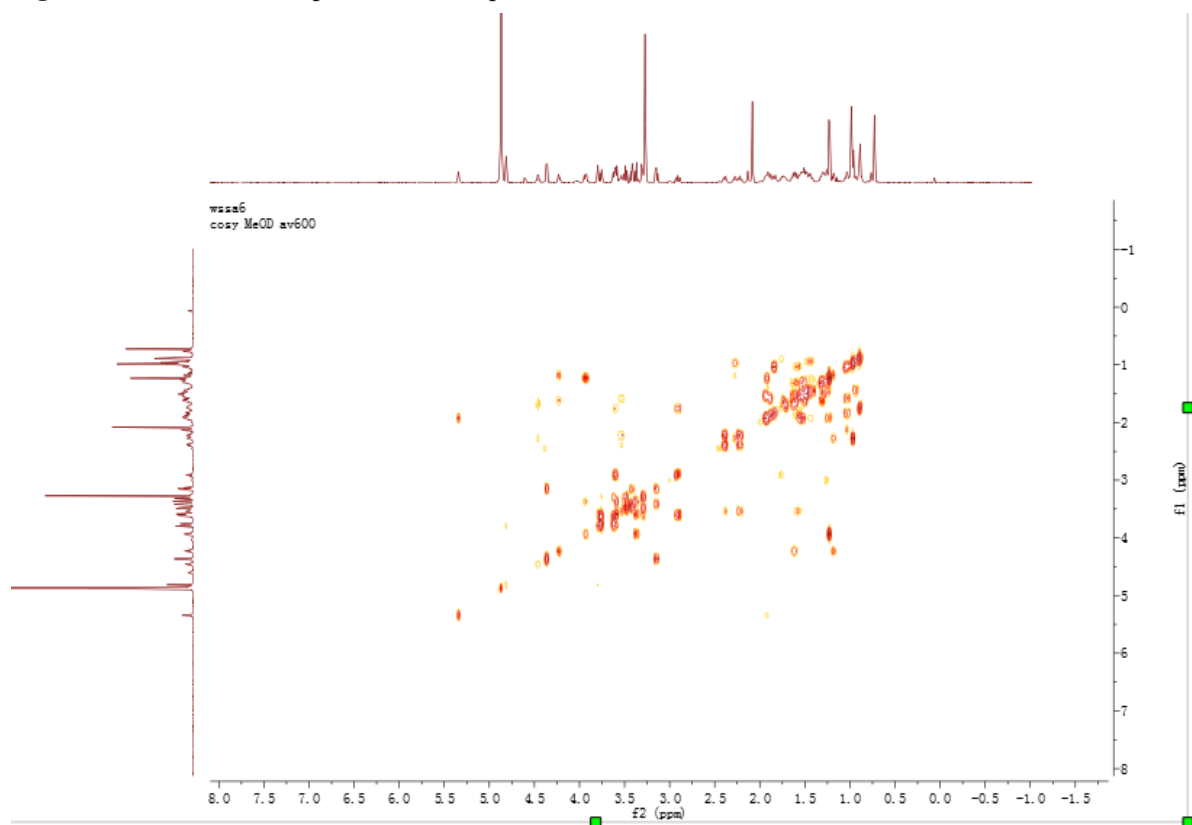

**Figure S7.** ROSEY Spectrum of compound **1** ( $\text{CD}_3\text{OD}$ )

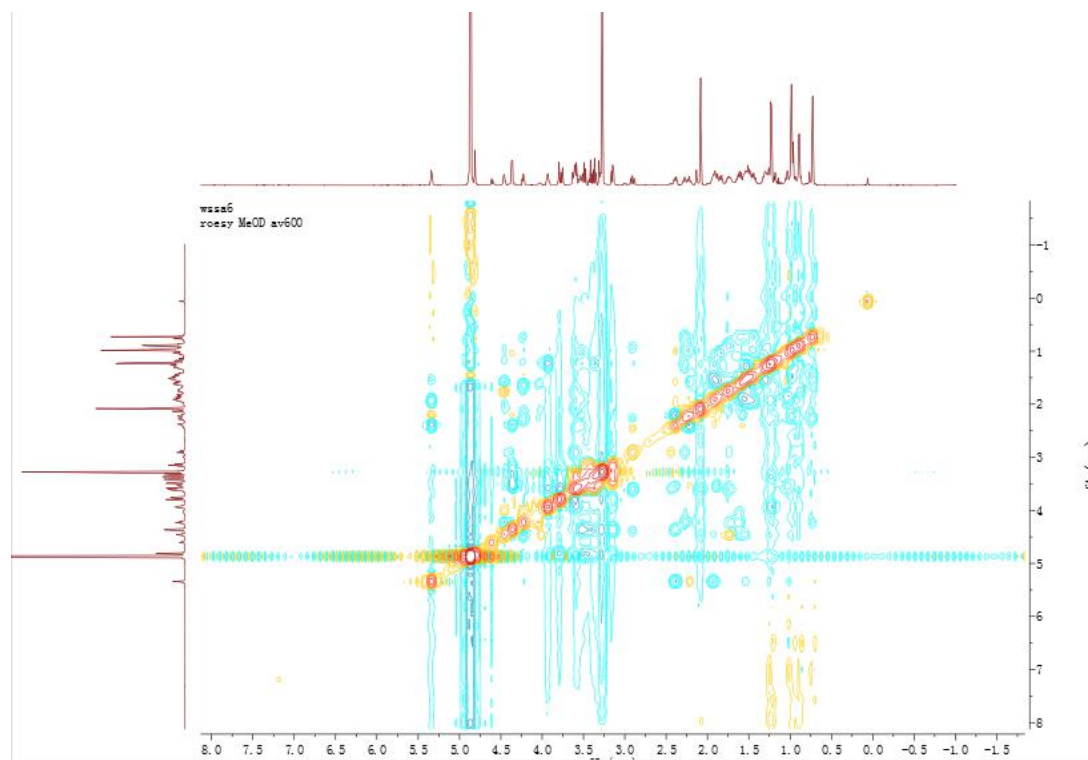

Figure S8. HRESIMS Spectrum of compound 1

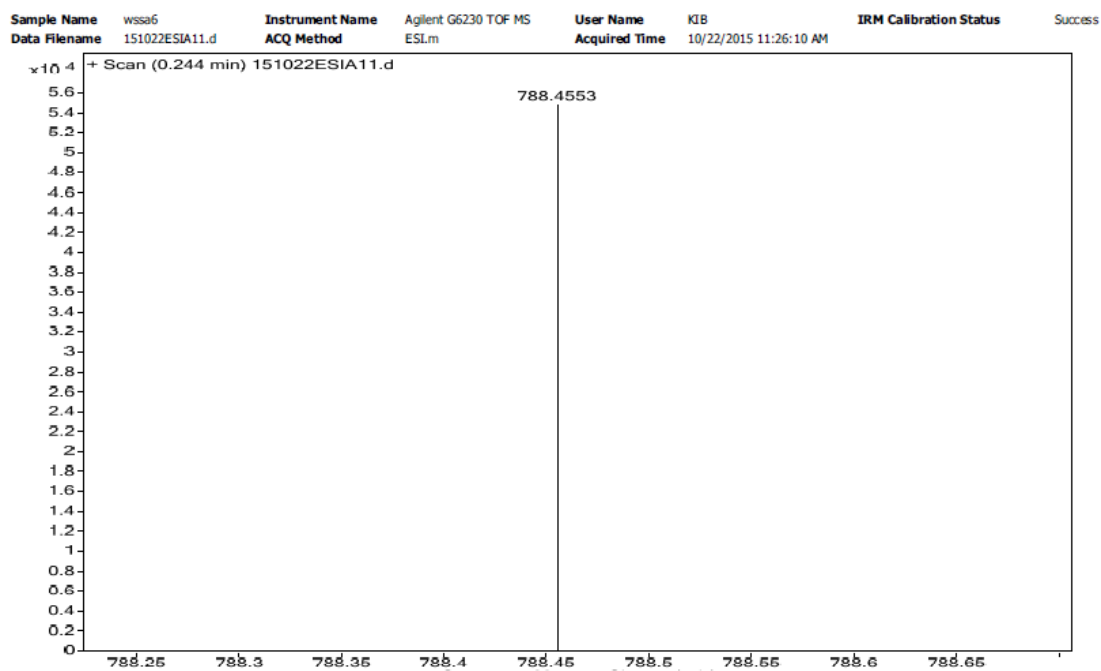

Figure S9. IR spectrum of compound 1

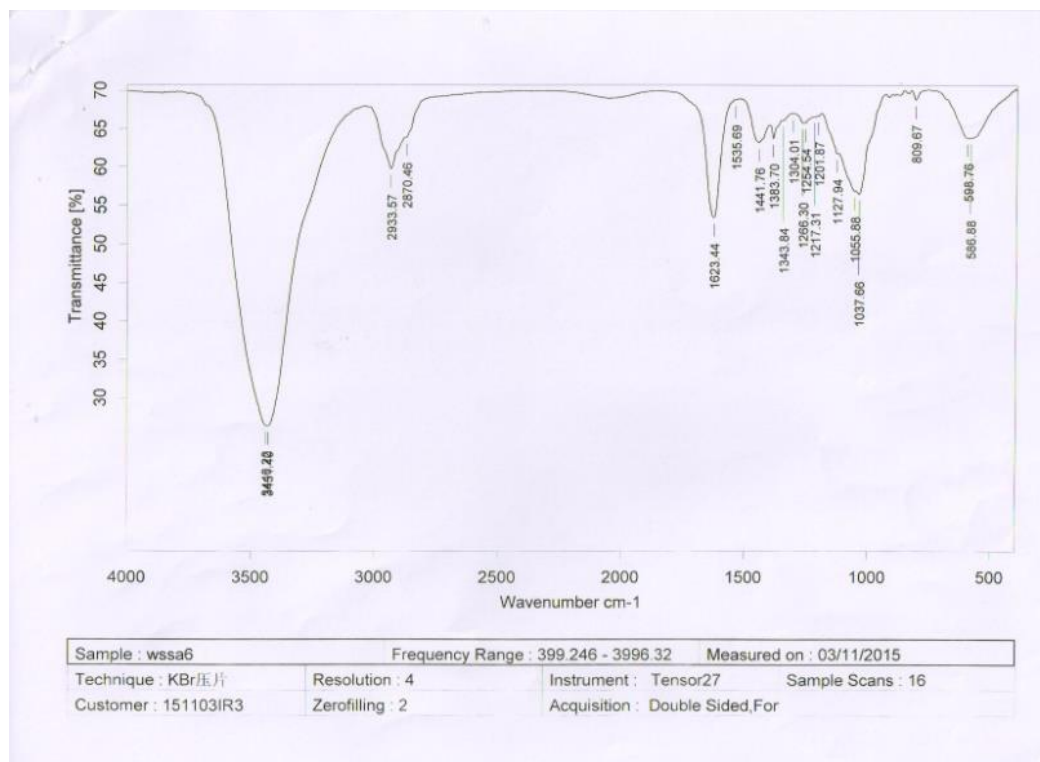

**Figure S10.**  $^1\text{H}$  NMR spectrum of compound **2** ( $\text{CD}_3\text{OD}$ )

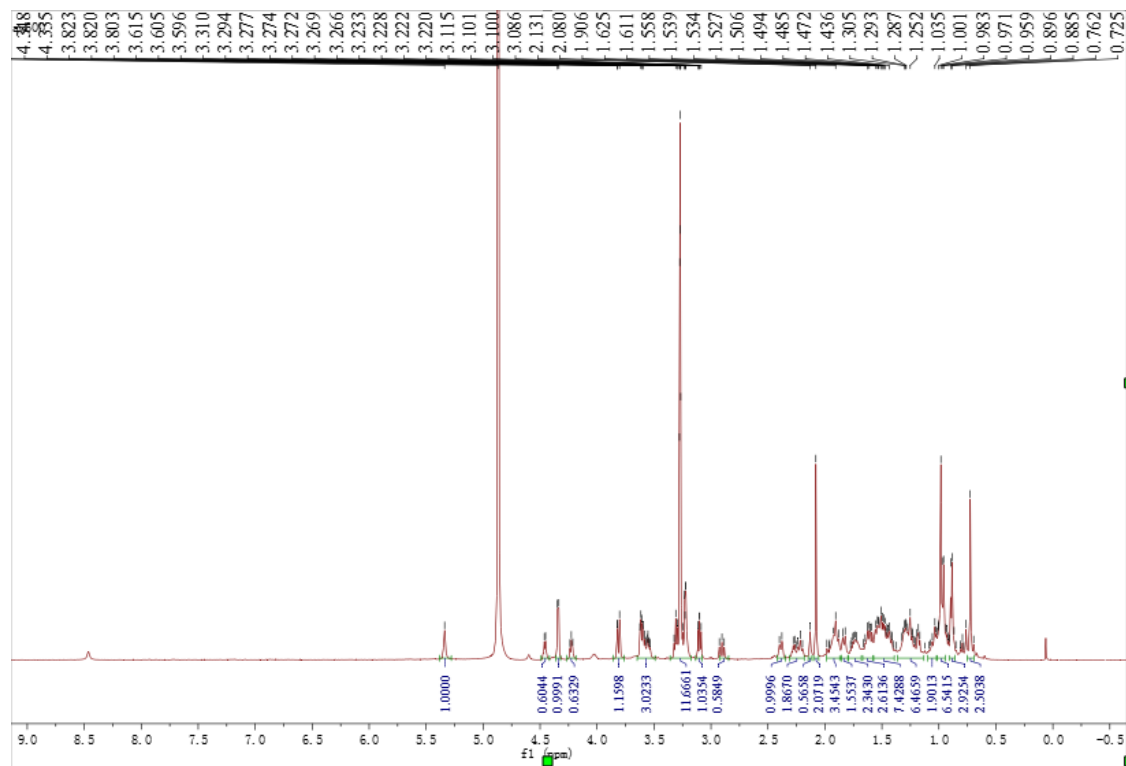

**Figure S11.**  $^{13}\text{C}$  and DEPT spectrum of compound **2** ( $\text{CD}_3\text{OD}$ )

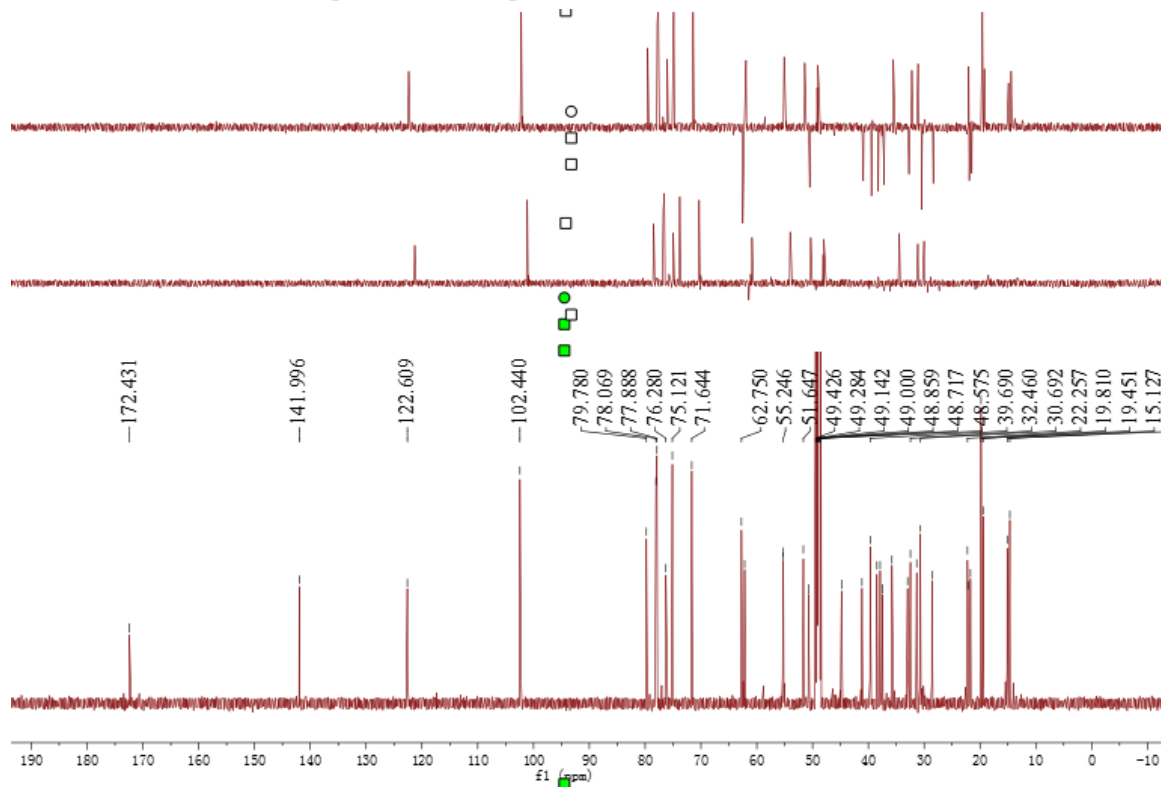



**Figure S12.** HSQC spectrum of compound **2** (CD<sub>3</sub>OD)

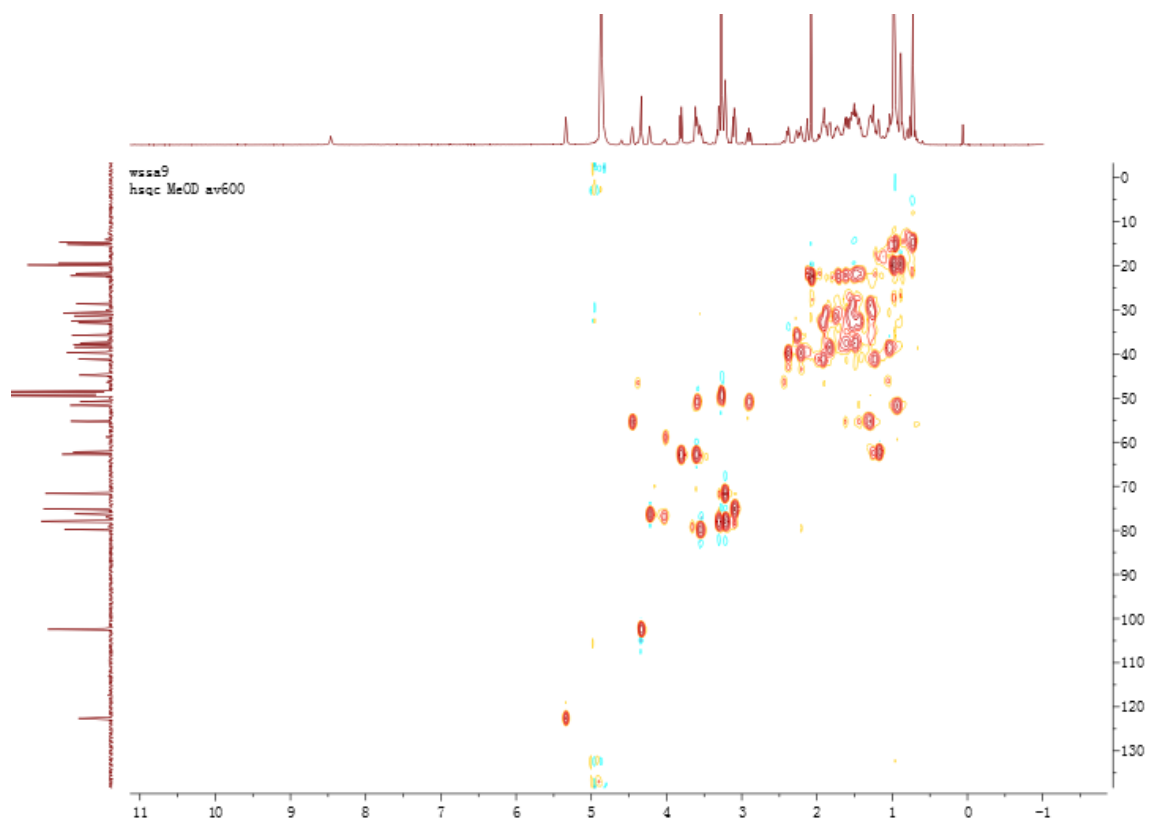

**Figure S13.** HMBC Spectrum of compound **2** (CD<sub>3</sub>OD)

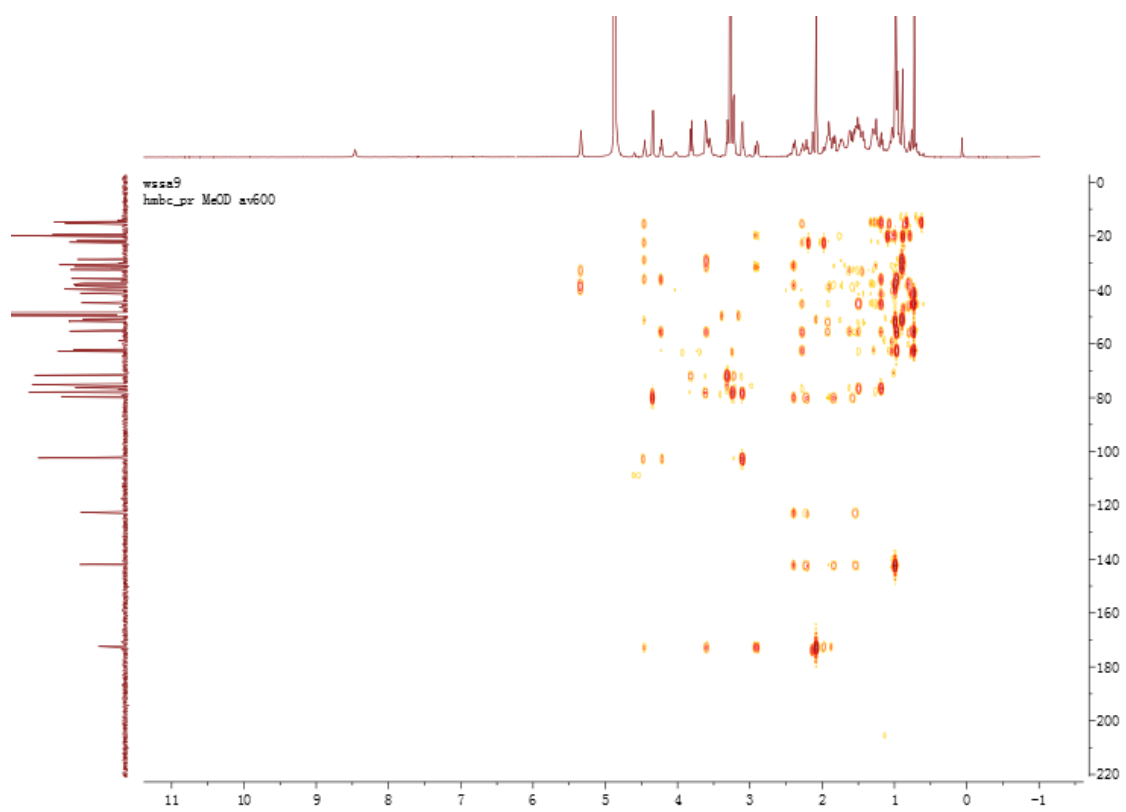

**Figure S14.**  $^1\text{H}$ - $^1\text{H}$  COSY Spectrum of compound **2** ( $\text{CD}_3\text{OD}$ )

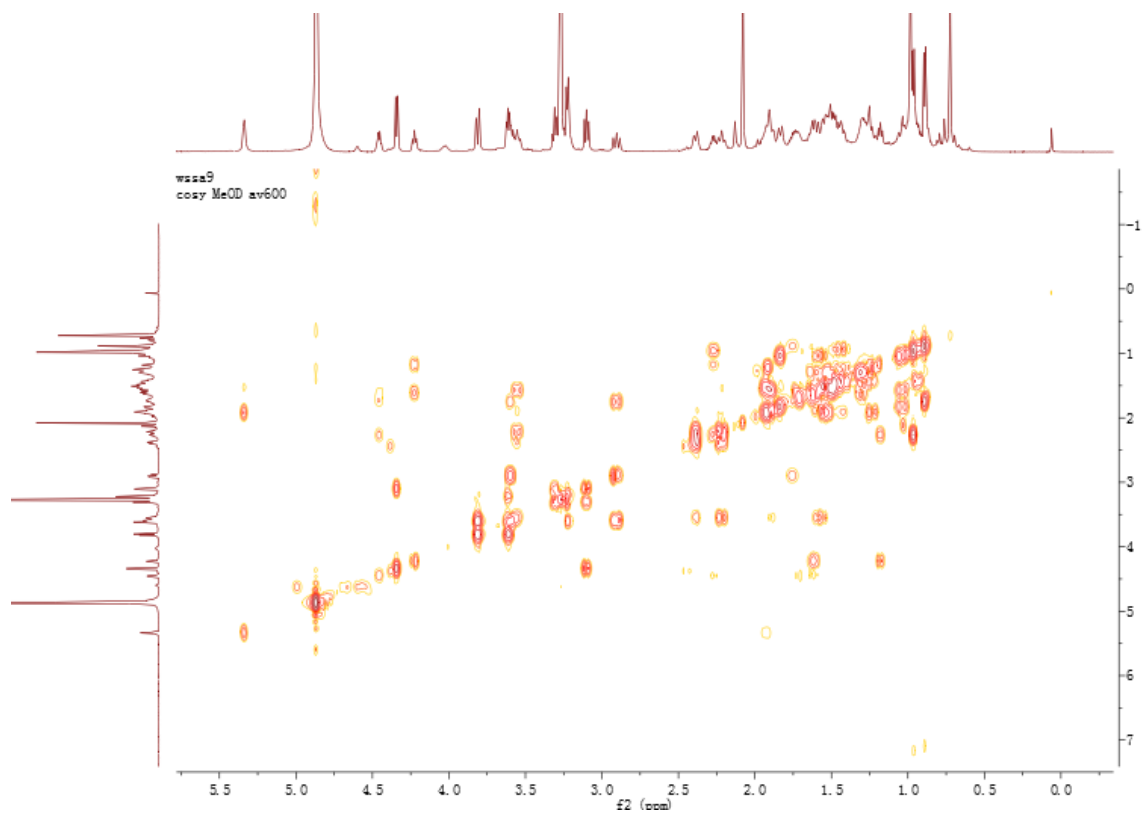

**Figure S15.** ROSEY Spectrum of compound **2** ( $\text{CD}_3\text{OD}$ )

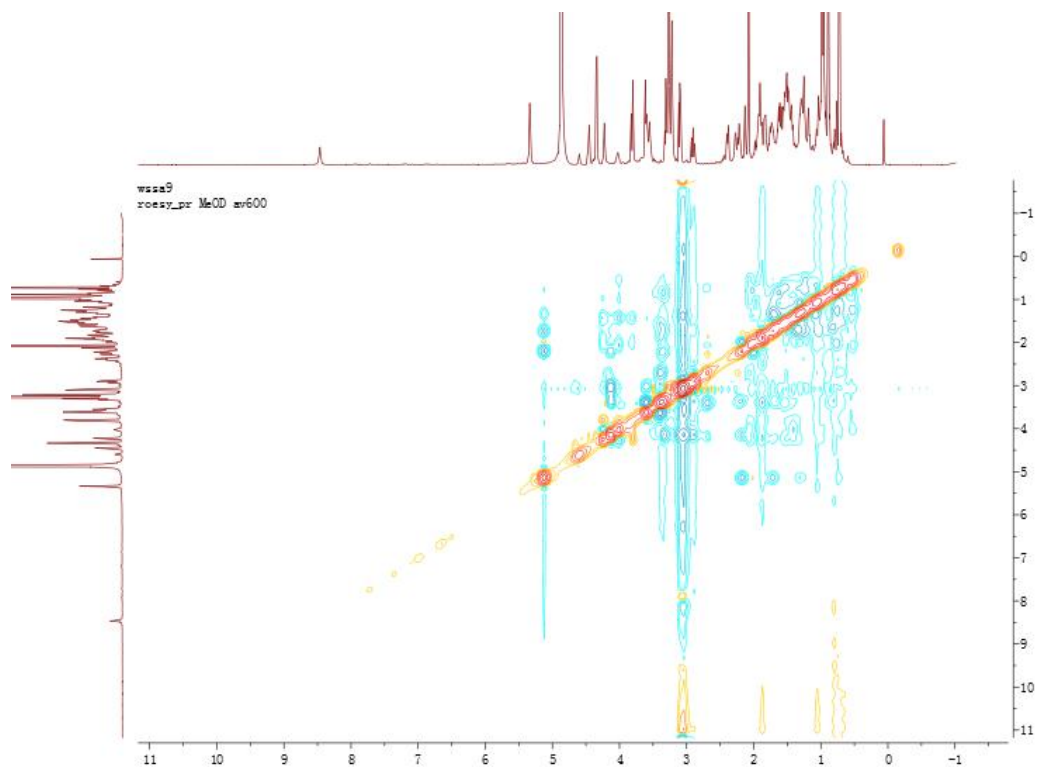

Figure S16. HRESIMS Spectrum of compound 2

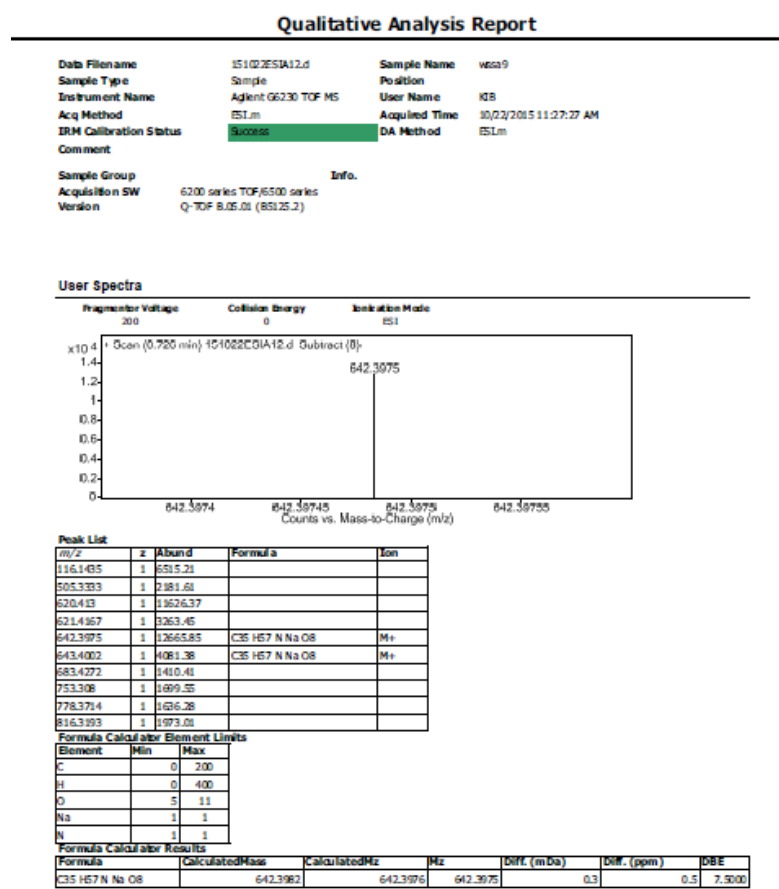

Figure S17. IR Spectrum of compound 2

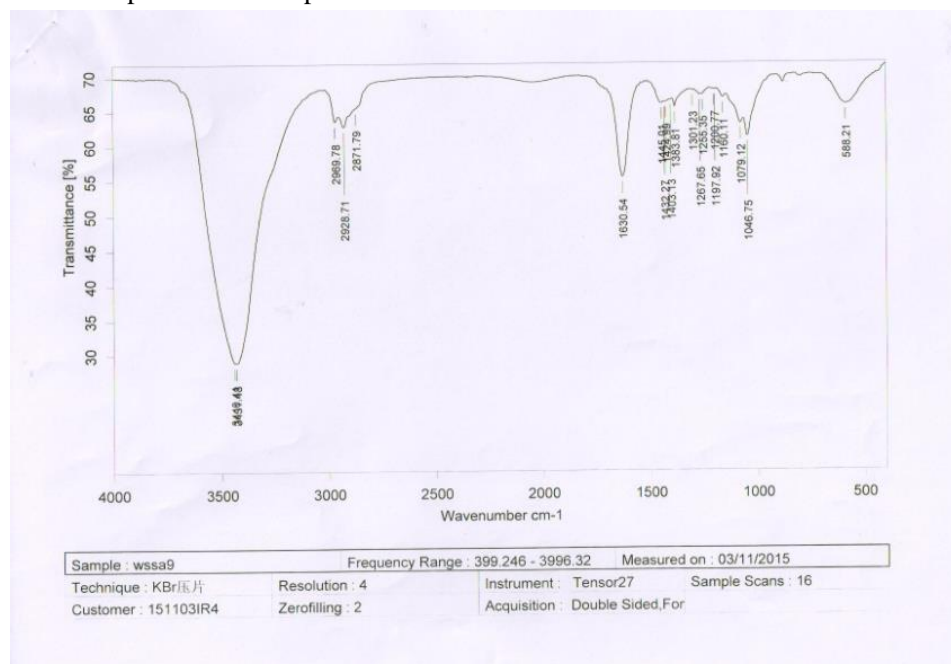

Figure S18.  $^1\text{H}$  NMR spectrum of compound **3** ( $\text{CD}_3\text{OD}$ )

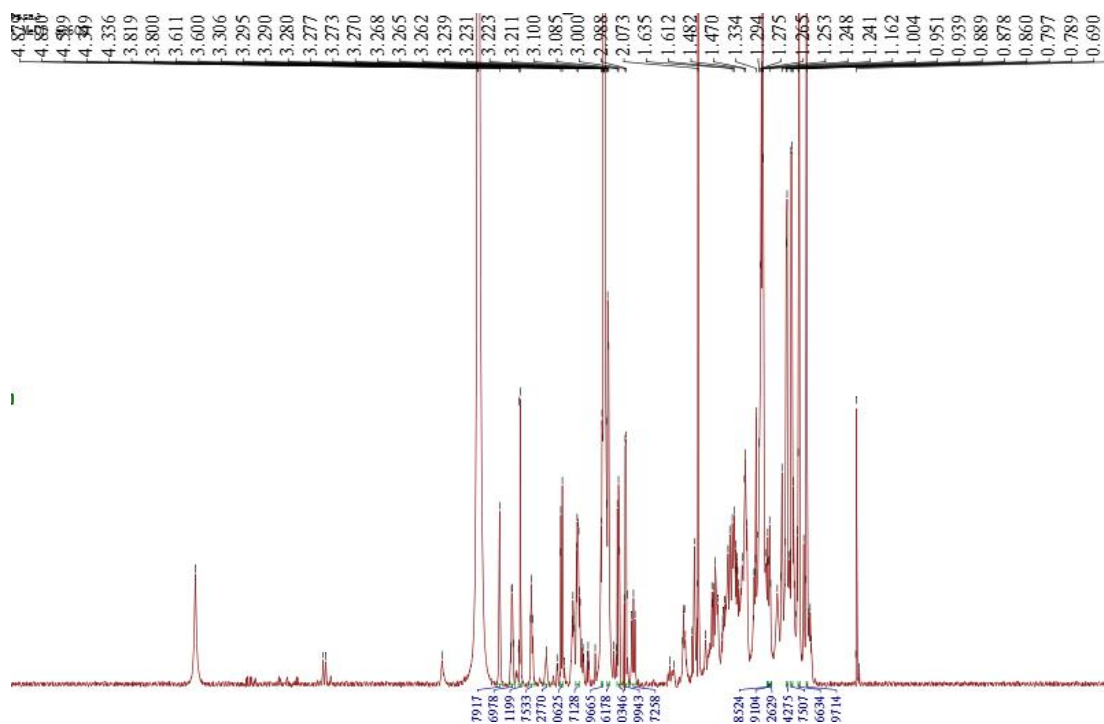

Figure S19.  $^{13}\text{C}$  and DEPT spectrum of compound **3** ( $\text{CD}_3\text{OD}$ )

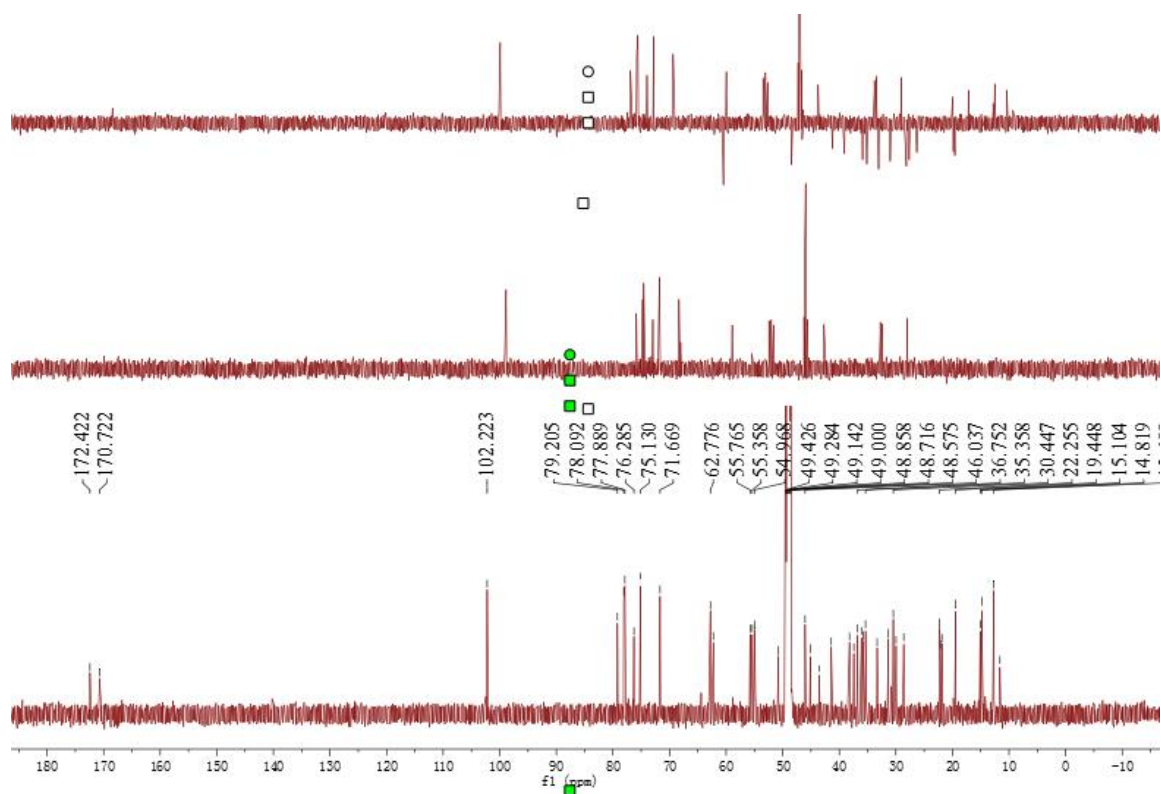

**Figure S20.** HMBC Spectrum of compound **3** (CD<sub>3</sub>OD)

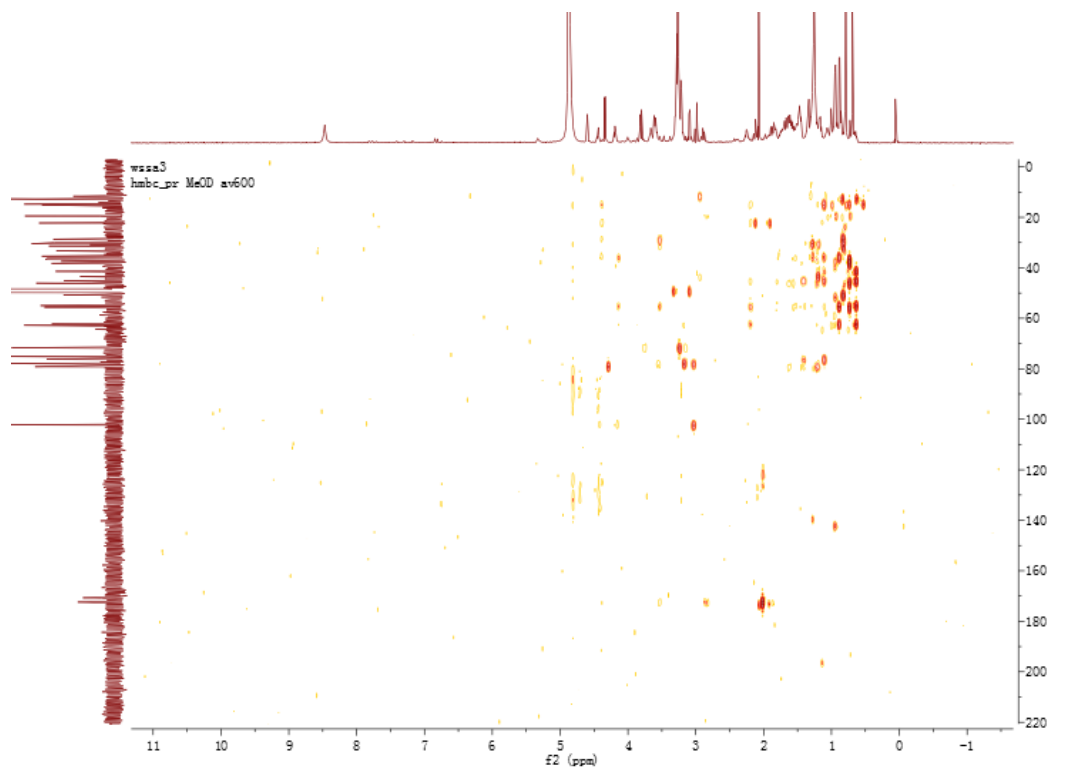

**Figure S21.** HSQC Spectrum of compound **3** (CD<sub>3</sub>OD)

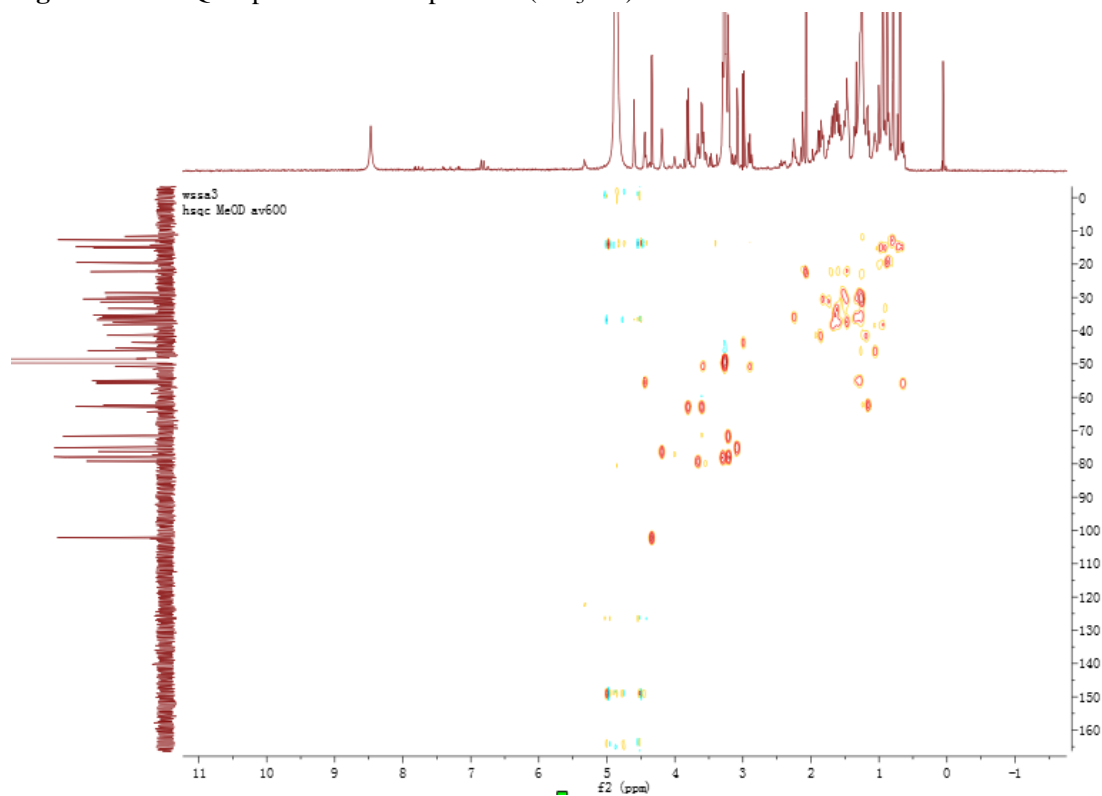

**Figure S22.**  $^1\text{H}$ - $^1\text{H}$  COSY Spectrum of compound **3** ( $\text{CD}_3\text{OD}$ )

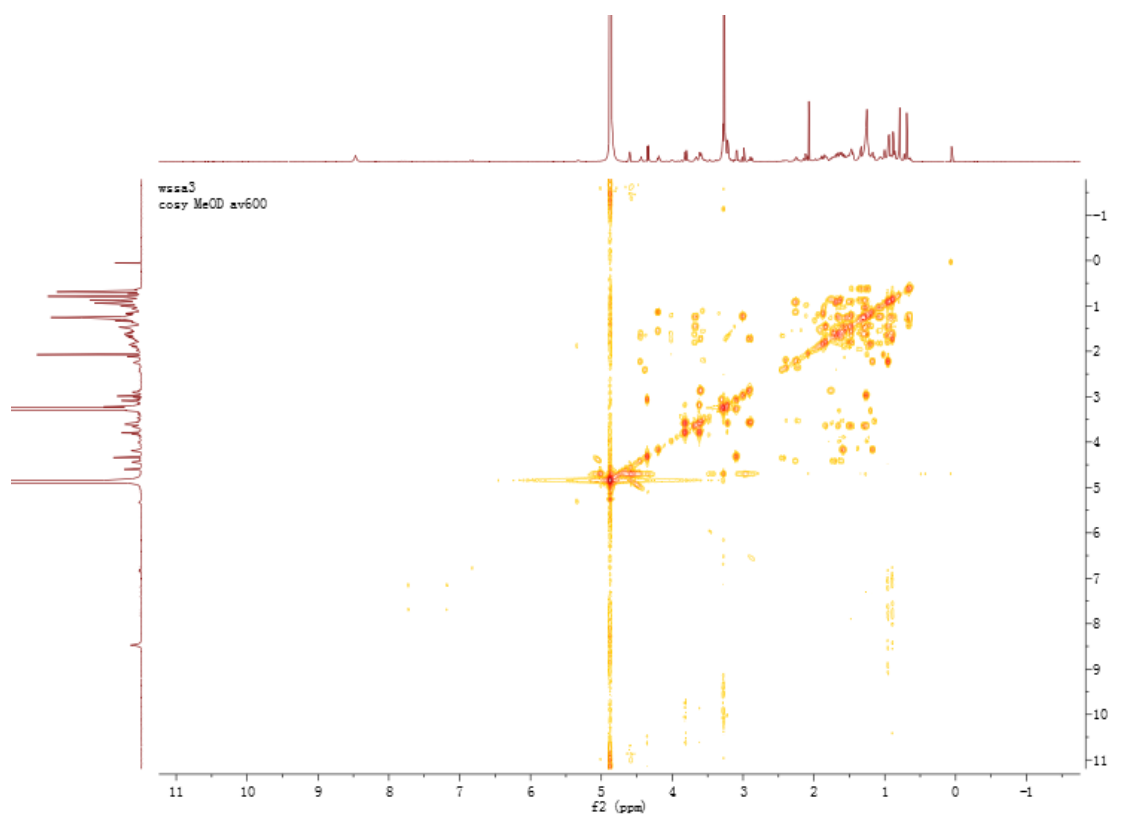

**Figure S23.** ROSEY Spectrum of compound **3** ( $\text{CD}_3\text{OD}$ )

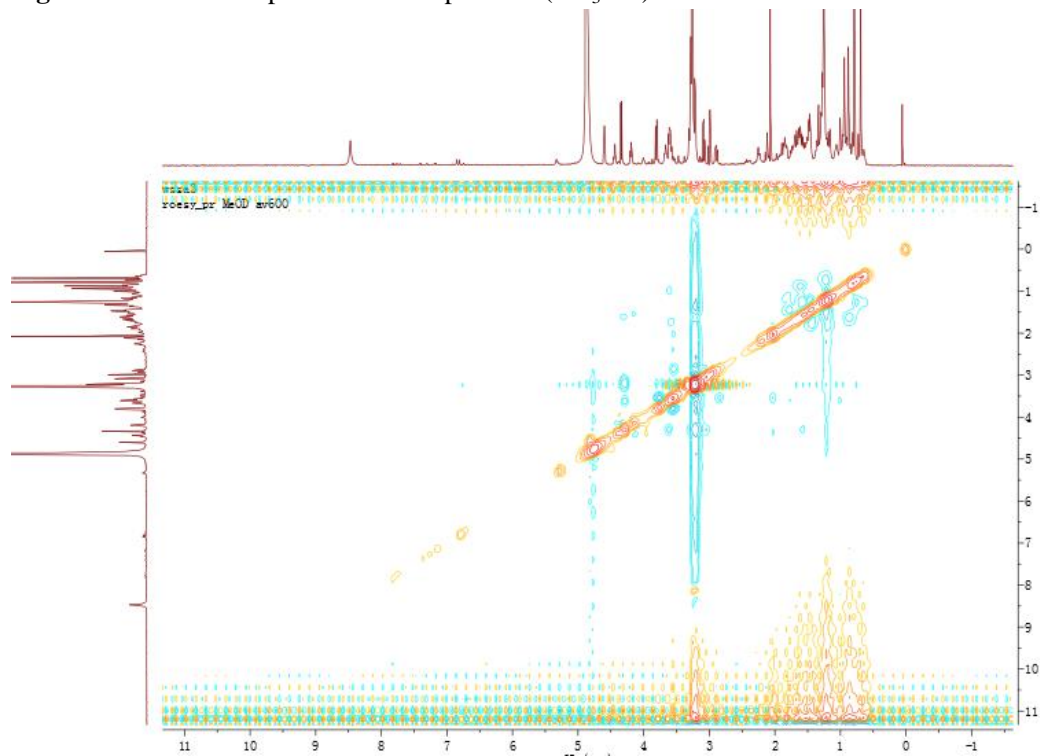

Figure S24. HRESIMS Spectrum of compound 3

Elemental Composition Report

Single Mass Analysis

Tolerance = 10.0 PPM / DBE: min = -10.0, max = 120.0

Selected filters: None

Monoisotopic Mass, Odd and Even Electron Ions

24 formula(e) evaluated with 1 results within limits (up to 51 closest results for each mass)

Elements Used:

C: 0-200 H: 0-400 N: 1-1 O: 7-9

wssa3  
15:17:46 06-Apr-2016  
Voltage El+

K1B  
M160406EA-02AFAMM 12 (1.101)  
621.4231

Autospec Premier  
P776  
1.67

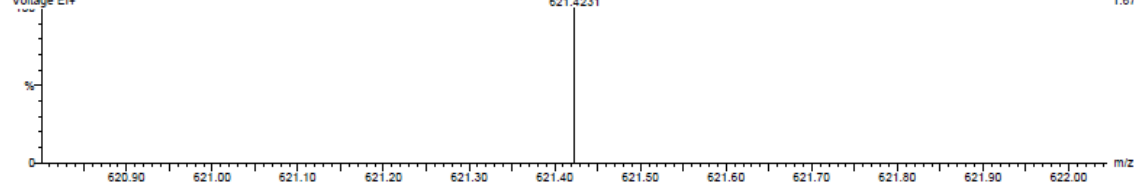

Minimum: -10.0  
Maximum: 200.0 10.0 120.0

| Mass     | Calc. Mass | mDa  | PPM  | DBE | i-FIT     | Formula      |
|----------|------------|------|------|-----|-----------|--------------|
| 621.4231 | 621.4241   | -1.0 | -1.6 | 7.0 | 5546025.5 | C35 H59 N O8 |

Figure S25. IR Spectrum of compound 3 (CD<sub>3</sub>OD)

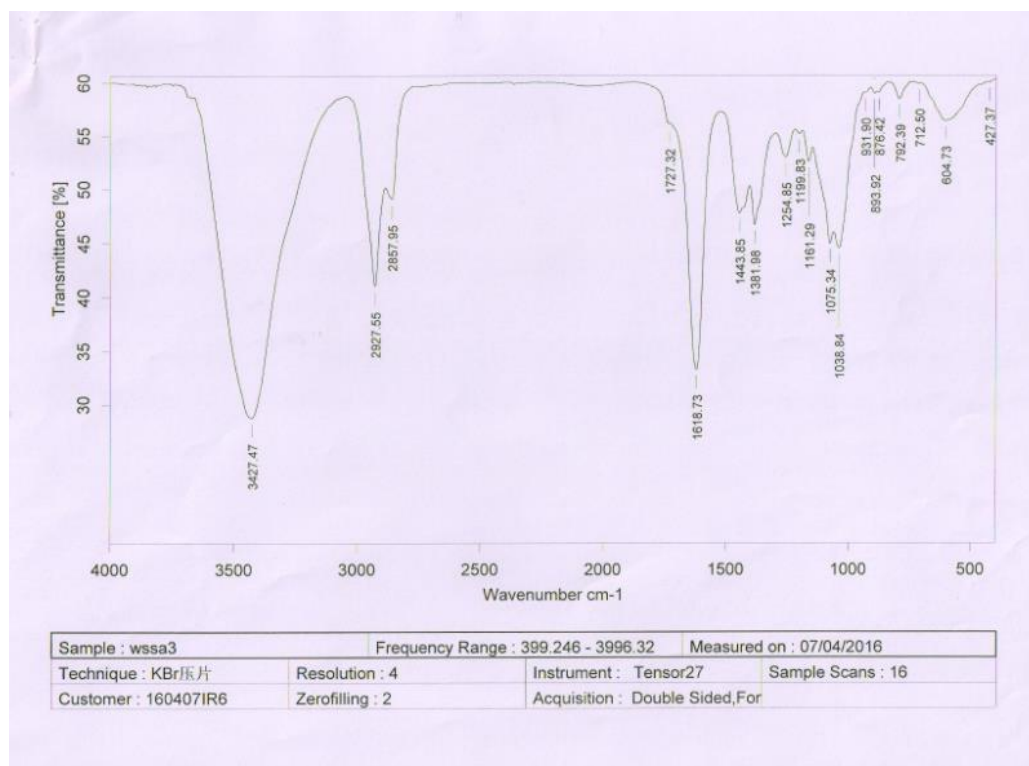

Supplement: 13659_2016_103_MOESM1_ESM.pdf [file 13659_2016_103_MOESM1_ESM.pdf]
